# Supplementary material for: Human-facilitated metapopulation dynamics in an emerging pest species, Cimex lectularius
Source: PubMed Central journal article supplement (PMC4016754; doi:10.1111/mec.12673), 2014-02-17

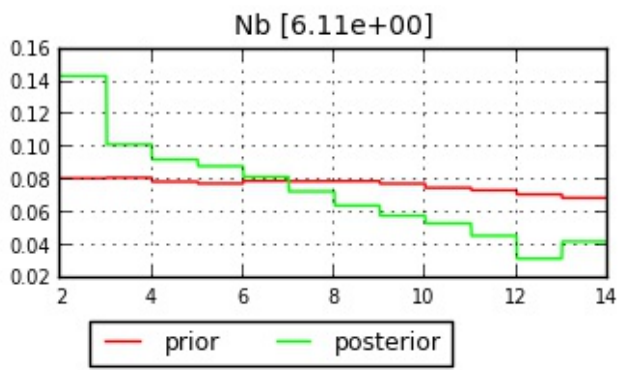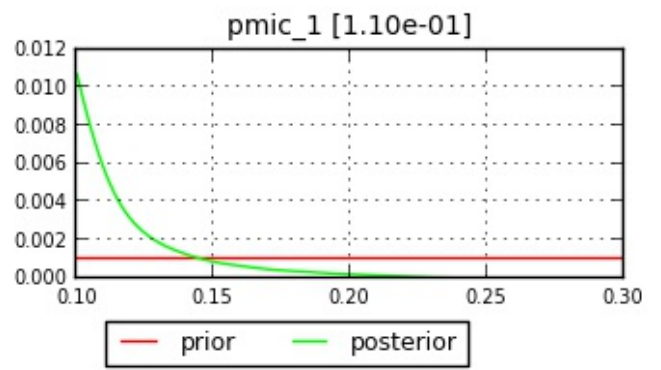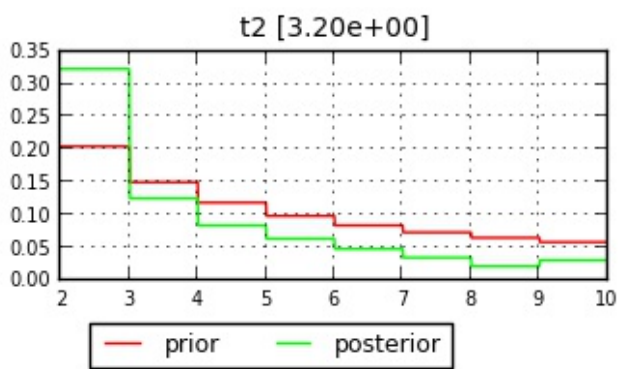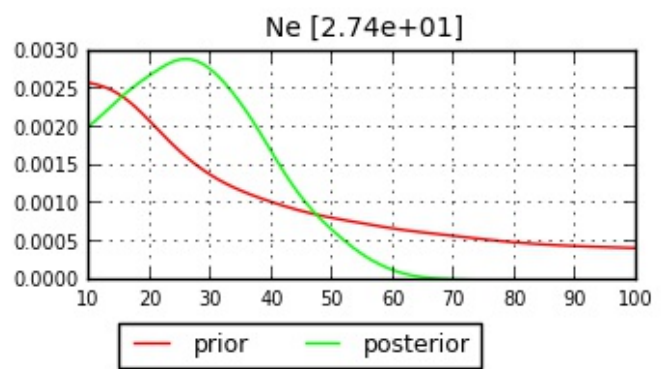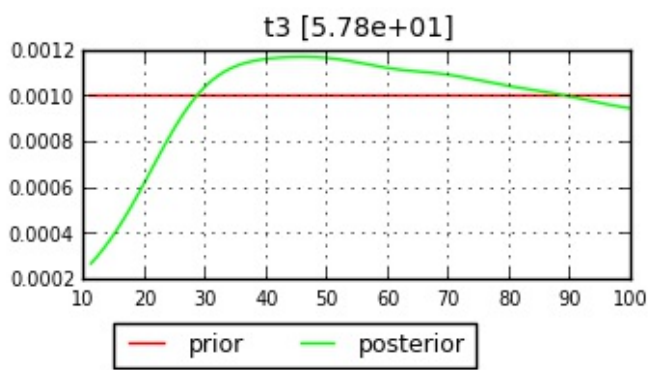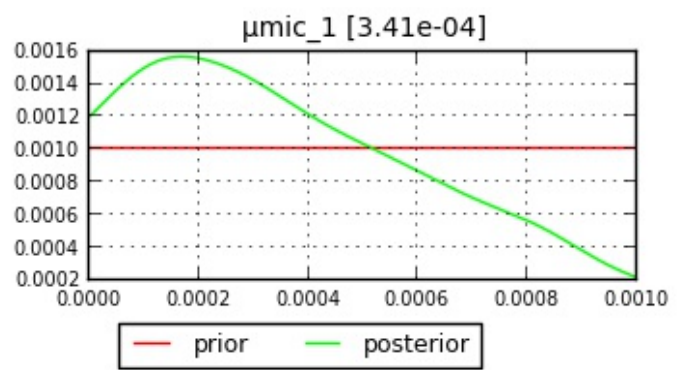

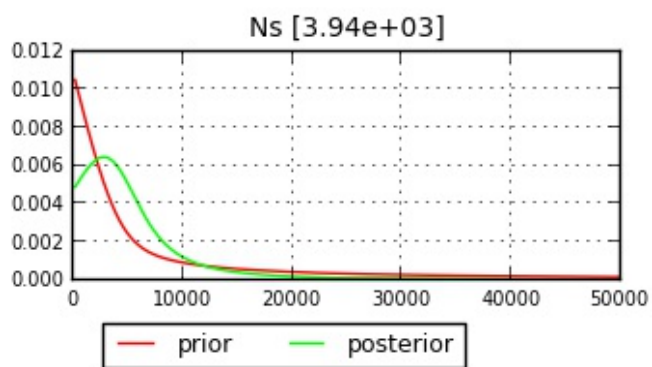

Supplement: mec0023-1071-sd3.pdf [file mec0023-1071-sd3.pdf]
